# Supplementary material
Source: publisher site journal article supplement (https://www.dovepress.com/article/398953)
Supplement: Supplementary file 1 [file get_supplementary_file.php]

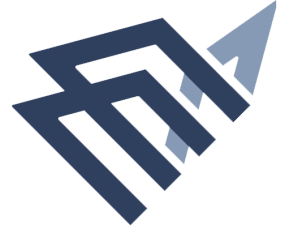

## Study Questionnaire "Review of Pediatric Hip Spica Tables: The Past, Present and Future"

### Consent for participating in the questionnaire

The following survey aims to collect data in favor of a research titled: “Review of Pediatric Hip Spica Tables: The Past, Present and Future”.

Kindly note that the information you are about to provide will remain confidential and will not incur any personal or professional damage to you, as the data provided by you regarding your institution’s spica practice will only be used for analytic purposes within the context of this study anonymously, in order to help us infer and conclude recommendations to improve the practice of Spica Tables amongst pediatric orthopedics worldwide in the future.

Please be informed that participation in this study (by filling the survey) is not compulsory, and you may withdraw from participating at any point you desire by terminating the survey or contacting the number or e-mail provided below if you have already submitted it.

If you choose to precede, with informed consent, kindly answer all the following questions in this questionnaire with honesty and clarity.

In case you have any questions, we urge you to contact the principal investigator by either:

Phone number: 0560049742

E-mail: 2170000707@iaau.edu.sa

And thank you immensely for your time.

I hereby declare that I agree on all study terms and to participate by answering the provided questionnaire.

## Part One: Respondent and institution information

Email Address (optional)

\* Current medical practice position

- Fellow
  - Specialist
  - Consultant
- 

\* Years of experience in pediatric orthopedics

- 0-10
  - 11-20
  - >20
- 

\* Country of training in pediatric orthopedic fellowship

- Local program
  - Europe
  - Korea
  - North America
  - Australia
  - None
  - Other (specify)
-

\* Your current workplace (You can choose more than one)

- Private institution
  - MOH institution
  - A medical city
  - A university hospital
  - National guard hospital
  - Military hospital
  - Other (specify)
-

\* Choose the city/country of your institution

### GCC Countries

- Bahrain
- Kuwait
- Oman
- Qatar
- United Arab Emirates

### Saudi Arabia

- Riyadh
- Al Qassem
- Jeddah
- Mecca
- Al Madinah
- Dammam
- Dhahran
- Khobar
- Al Ahsaa
- Hafr Albatin
- Jubail
- Hail
- Tabuk
- Abha
- Al Baha

Other city in Saudi Arabia (mention the city)

---

## Part Two: Hip Spica Table

\* Do you practice pediatric hip spica cast application in your current institution?

Yes

No

---

\* What spica table do you use?

Locally customized

Armboard

Company-manufactured

Other

---

Since your spica table is company-manufactured, please mention the name of the company (optional)

---

---

\* What is the material of your locally-customized hip spica table

Wood

Metal

Other (Please specify)

---

\* Please answer the following according to what applies on your locally-customized hip spica table

|                                | Yes                   | No                    |
|--------------------------------|-----------------------|-----------------------|
| The table has a back support   | <input type="radio"/> | <input type="radio"/> |
| The table has a sacral support | <input type="radio"/> | <input type="radio"/> |
| The table is portable          | <input type="radio"/> | <input type="radio"/> |

Please upload a photo of your locally customized table, if available.

Drag your file here

Or, if you prefer

[Browse](#)

\* if you are not using a company-manufactured table, what are the reasons? you can choose more than one reason.

- Too expensive
- Very few cases are treated
- No trained staff
- I don't know the companies that provide spica tables
- Other

\* What price range of company-manufactured table is considered to be suitable for your institution?

- 1,000-10,000
  - 10,000-30,000
  - 30,000-50,000
  - > 50,0000
  - I don't know
- 

\* Where do you use the hip spica table? (you can choose more than 1)

- Operating room
  - Emergency room
  - In-patient Ward
  - Out-patient Clinics
- 

\* How Many assistants on average do you need when applying the Spica?

- 1
  - 2
  - 3
  - 4
  - 5 and more
- 

\* What are the advantages of your currently used hip spica table structure?



---

\* In your current practice, what difficulties you are anticipating while using your hip spica table?

---

\* Do you face difficulties with your current spica application when taking an X-Ray?

Yes

No

---

\* Do you face difficulties with your current spica application when the patient weigh more than 50.0Kg?

Yes

No

---

\* Do you face difficulties with anesthesia in regards to your hip spica table?

Yes

No

---

\* From your experience, what structural modifications on the spica table would you recommend to improve the cast application process
